# Supplementary material for: Why old duplicated genes are not thrown away in (paleo)polyploids? Example from the petC gene in Brassica napus
Source: Springer Nature journal article supplement (doi:10.1007/s11103-023-01387-9), 2023-11-01
Supplement: MOESM2 [file 11103_2023_1387_MOESM2_ESM.pdf]

Why old duplicated genes are not thrown away in (paleo)polyploids? Example from the *petC* gene in *Brassica napus*

*Plant Molecular Biology*

Maud Facon<sup>1</sup>, Gwenaëlle Deniot<sup>1</sup>, Maryse Lode-Taburel<sup>1</sup>, Héloïse Archambeau<sup>1</sup>, Emilie Montes<sup>1</sup>, Younes Delloero<sup>1</sup>, Loeiz Maillat<sup>1</sup>, Anne-Marie Chèvre<sup>1</sup>, Mathieu Rousseau-Gueutin<sup>1\*</sup>

<sup>1</sup>IGEPP, INRAE, Institut Agro, Université de Rennes, 35650 Le Rheu, France

Mathieu Rousseau-Gueutin : mathieu.rousseau-gueutin@inrae.fr

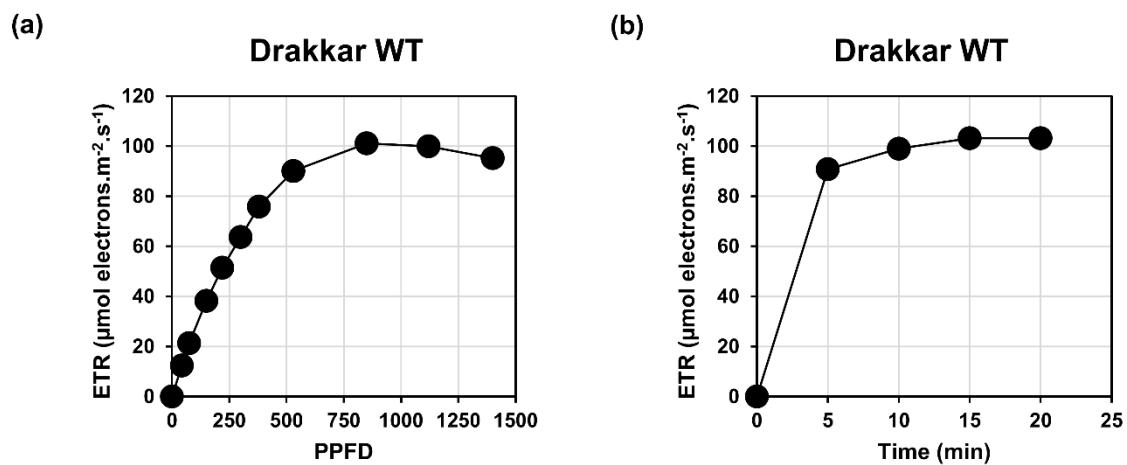

**Figure S1. Light and time-dependent saturation of PSII Electron Transfer Rate after 20 min at a PPFD of 971. (a)** Light-response curve, showing a saturating phase for the Photosystem II (PSII) electron transfer rate from 750 to 1400 PPFD. **(b)** Kinetic response curve at a PPFD of 971, showing a saturating phase from 15 to 20 min. These results allowed to select an experimental setup measuring the maximal capacity of the PSII electron transfer rate in *Brassica napus*.
