# Supplementary material for: Why old duplicated genes are not thrown away in (paleo)polyploids? Example from the petC gene in Brassica napus
Source: Springer Nature journal article supplement (doi:10.1007/s11103-023-01387-9), 2023-11-01
Supplement: MOESM3 [file 11103_2023_1387_MOESM3_ESM.pdf]

**Why old duplicated genes are not thrown away in (paleo)polyploids? Example from the *petC* gene in *Brassica napus***

***Plant Molecular Biology***

Maud Facon<sup>1</sup>, Gwenaëlle Deniot<sup>1</sup>, Maryse Lode-Taburel<sup>1</sup>, Heloïse Archambeau<sup>1</sup>, Emilie Montes<sup>1</sup>, Younes Delloero<sup>1</sup>, Loeiz Maillet<sup>1</sup>, Anne-Marie Chèvre<sup>1</sup>, Mathieu Rousseau-Gueutin<sup>1\*</sup>

<sup>1</sup>IGEPP, INRAE, Institut Agro, Université de Rennes, 35650 Le Rheu, France

Mathieu Rousseau-Gueutin : [mathieu.rousseau-gueutin@inrae.fr](mailto:mathieu.rousseau-gueutin@inrae.fr)

**Table S1.** Accession numbers of the different Brassicaceae *petC* sequences used for the phylogenetic analyses.

| Species                     | Cultivar | Genome version | Gene name          |
|-----------------------------|----------|----------------|--------------------|
| <i>Arabidopsis thaliana</i> | Col0     | TAIR10         | AT4G03280          |
| <i>Brassica juncea</i>      | AU213    | V1.0           | BjuOA03G29680      |
| <i>Brassica juncea</i>      | AU213    | V1.0           | BjuOA09G02300      |
| <i>Brassica juncea</i>      | AU213    | V1.0           | BjuOB08G31750      |
| <i>Brassica juncea</i>      | AU213    | V1.0           | BjuOB08G38060      |
| <i>Brassica juncea</i>      | T84-66   | V2.0           | BjuVA03G29860      |
| <i>Brassica juncea</i>      | T84-66   | V2.0           | BjuVA09G02270      |
| <i>Brassica juncea</i>      | T84-66   | V2.0           | BjuVB08G31810      |
| <i>Brassica juncea</i>      | T84-66   | V2.0           | BjuVB08G37680      |
| <i>Brassica oleracea</i>    | HDEM     | V1.0           | BolC3t15998H       |
| <i>Brassica oleracea</i>    | HDEM     | V1.0           | BolC9t53193H       |
| <i>Brassica oleracea</i>    | JZS      | V2             | BolC03g033660.2J   |
| <i>Brassica oleracea</i>    | JZS      | V2             | BolC09g002610.2J   |
| <i>Brassica rapa</i>        | Chiifu   | V3.0           | BraA03g028630.3C   |
| <i>Brassica rapa</i>        | Chiifu   | V3.0           | BraA09g001100.3C   |
| <i>Brassica rapa</i>        | Z1       | V2             | A03p30540.2_BraZ1  |
| <i>Brassica rapa</i>        | Z1       | V2             | A09p02430.2_BraZ1  |
| <i>Brassica napus</i>       | Darmor   | V10            | A03p30490.1_BnaDAR |
| <i>Brassica napus</i>       | Darmor   | V10            | C03p36910.1_BnaDAR |
| <i>Brassica napus</i>       | Darmor   | V10            | C09p02650.1_BnaDAR |
| <i>Brassica napus</i>       | Darmor   | V10            | A09p02620.1_BnaDAR |
| <i>Brassica napus</i>       | Drakkar  |                | See supp. results  |
| <i>Brassica napus</i>       | Drakkar  |                | See supp. results  |
| <i>Brassica napus</i>       | Drakkar  |                | See supp. results  |
| <i>Brassica napus</i>       | Drakkar  |                | See supp. results  |
| <i>Brassica napus</i>       | Zs11     | V2.0           | BnA01g0041550.1    |
| <i>Brassica napus</i>       | Zs11     | V2.0           | BnA03g0120040.1    |
| <i>Brassica napus</i>       | Zs11     | V2.0           | BnC03g0572990.1    |
| <i>Brassica napus</i>       | Zs11     | V2.0           | BnC09g0888010.1    |
| <i>Brassica nigra</i>       | Ni100    | V2             | BniB08g038940.2N.1 |
| <i>Brassica nigra</i>       | Ni100    | V2             | BniB08g046100.2N.1 |
| <i>Sisymbrium irio</i>      |          |                | Scaffold1709-19    |
