# Supplementary material for: Why old duplicated genes are not thrown away in (paleo)polyploids? Example from the petC gene in Brassica napus
Source: Springer Nature journal article supplement (doi:10.1007/s11103-023-01387-9), 2023-11-01
Supplement: MOESM4 [file 11103_2023_1387_MOESM4_ESM.xlsx]

## Sheet: petc-Brassicaceae_CDS_nucl-fina
Why old duplicated genes are not thrown away in (paleo)polyploids? Example from the petC gene in Brassica napus Plant Molecular Biology Maud Facon1, Gwenaelle Deniot1, Maryse Lode-Taburel1, Heloïse Archambeau1, Emilie Montes1, Younes Dellero1, Loeiz Maillet1, Anne-Marie Chèvre1, Mathieu Rousseau-Gueutin1* 1IGEPP, INRAE, Institut Agro, Université de Rennes, 35650 Le Rheu, France Mathieu Rousseau-G…
Table S2. Evaluation of dN/dS using PAML4 (Yang, 2007) and the Nei and Gojobori method (1986)
Species/accession	Gene-number
Arabidopsis thaliana Col0	AT4G03280
Sysymbrium irio	Si_1709_19	0.1965
Brassica rapa cv. Z1 (v2)	A03p30540.2Z1	0.1405	0.1219
Brassica rapa cv. Z1 (v2)	A09p02430.2Z1	0.1392	0.0555	0.1001
Brassica rapa cv. Chiifu (v3.0)	BraA03g028630.3C	0.1404	0.1066	0.1269	0.1039
Brassica rapa cv. Chiifu (v3.0)	BraA09g001100.3C	0.1409	0.0653	0.0989	0.0894	0.0956
Brassica oleracea cv JZS (v2)	BolC03g033660.2J	0.1366	0.0819	0.0947	0.0878	0.0514	0.0915
Brassica oleracea cv JZS (v2)	BolC09g002610.2J	0.1337	0.0468	0.0961	0.0404	0.0993	0.0433	0.0783
Brassica oleracea cv HDEM (v1)	BolC3t15998H	0.1241	0.0791	0.1423	0.0857	0.1573	0.0936	0.2425	0.0793
Brassica oleracea cv HDEM (v1)	BolC9t53193H	0.1413	0.0499	0.1026	0.0403	0.0991	0.0510	0.0832	-1.0000	0.0846
Brassica nigra cv Ni100	BniB08g038940.2N.1	0.1403	0.0999	0.0986	0.0907	0.0891	0.0911	0.0894	0.0803	0.1140	0.0855
Brassica nigra cv Ni100	BniB08g046100.2N.1	0.1190	0.0710	0.0913	0.0362	0.0941	0.0486	0.0824	0.0553	0.0814	0.0605	0.0732
Brassica napus cv Zs11 (v2)	BnA03g0120040.1	0.1284	0.1069	-1.0000	0.0899	0.0513	0.0899	0.0877	0.0849	0.1302	0.0874	0.0939	0.0862
Brassica napus cv Zs11 (v2)	BnC03g0572990.1	0.1241	0.0791	0.1423	0.0857	0.1573	0.0936	0.2425	0.0793	-1.0000	0.0846	0.1140	0.0814	0.1302
Brassica napus cv Zs11 (v2)	BnC09g0888010.1	0.1337	0.0468	0.0961	0.0404	0.0993	0.0433	0.0783	-1.0000	0.0793	-1.0000	0.0803	0.0553	0.0849	0.0793
Brassica napus cv Darmor (v10)	A03p30490.1_BnaDAR	0.1321	0.0982	0.0562	0.1001	-1.0000	0.0990	0.0436	0.0847	0.1299	0.0900	0.0891	0.0914	0.0472	0.1299	0.0847
Brassica napus cv Darmor (v10)	C03p36910.1_BnaDAR	0.1366	0.0819	0.0947	0.0878	0.0514	0.0915	-1.0000	0.0783	0.2425	0.0832	0.0894	0.0824	0.0877	0.2425	0.0783	0.0436
Brassica napus cv Darmor (v10)	C09p02650.1_BnaDAR	0.1337	0.0468	0.0961	0.0404	0.0993	0.0433	0.0783	-1.0000	0.0793	-1.0000	0.0803	0.0553	0.0849	0.0793	-1.0000	0.0847	0.0783
Brassica napus cv Darmor (v10)	A09p02620.1_BnaDAR	0.1392	0.0535	0.0896	-1.0000	0.0929	0.0617	0.0789	0.0512	0.0766	0.0434	0.0873	0.0346	0.0812	0.0766	0.0512	0.0897	0.0789	0.0512
Brassica juncea cv. T84-66 (v2)	BjuVA03G29860	0.1284	0.1069	-1.0000	0.0899	0.0513	0.0899	0.0877	0.0849	0.1302	0.0874	0.0939	0.0862	-1.0000	0.1302	0.0849	0.0472	0.0877	0.0849	0.0812
Brassica juncea cv. T84-66 (v2)	BjuVA09G02270	0.1154	0.0539	0.0735	0.0511	0.0758	0.0468	0.0669	0.0470	0.0667	0.0402	0.0687	0.0487	0.0714	0.0667	0.0470	0.0758	0.0669	0.0470	0.0896	0.0714
Brassica juncea cv. T84-66 (v2)	BjuVB08G31810	0.1403	0.0999	0.0986	0.0907	0.0891	0.0911	0.0894	0.0803	0.1140	0.0855	-1.0000	0.0732	0.0939	0.1140	0.0803	0.0891	0.0894	0.0803	0.0873	0.0939	0.0687
Brassica juncea cv. T84-66 (v2)	BjuVB08G37680	0.1157	0.0665	0.0913	0.0346	0.0941	0.0467	0.0824	0.0530	0.0814	0.0578	0.0683	-1.0000	0.0862	0.0814	0.0530	0.0942	0.0824	0.0530	0.0331	0.0862	0.0468	0.0683
Brassica juncea cv. AU213 (v1)	BjuOA03G29680	0.1551	0.1401	0.0693	0.1186	0.0783	0.0957	0.0759	0.1112	0.1549	0.1111	0.1096	0.1114	0.0514	0.1549	0.1112	0.0513	0.0759	0.1112	0.1063	0.0514	0.0899	0.1096	0.1114
Brassica juncea cv. AU213 (v1)	BjuOA09G02300	0.1154	0.0539	0.0735	0.0511	0.0758	0.0468	0.0669	0.0470	0.0667	0.0402	0.0687	0.0487	0.0714	0.0667	0.0470	0.0758	0.0669	0.0470	0.0896	0.0714	-1.0000	0.0687	0.0468	0.0899
Brassica juncea cv. AU213 (v1)	BjuOB08G31750	0.1403	0.0999	0.0986	0.0907	0.0891	0.0911	0.0894	0.0803	0.1140	0.0855	-1.0000	0.0732	0.0939	0.1140	0.0803	0.0891	0.0894	0.0803	0.0873	0.0939	0.0687	-1.0000	0.0683	0.1096	0.0687
Brassica juncea cv. AU213 (v1)	BjuOB08G38060	0.1190	0.0710	0.0913	0.0362	0.0941	0.0486	0.0824	0.0553	0.0814	0.0605	0.0732	-1.0000	0.0862	0.0814	0.0553	0.0914	0.0824	0.0553	0.0346	0.0862	0.0487	0.0732	-1.0000	0.1114	0.0487	0.0732
Brassica napus cv Drakkar	Drakkar_C03	0.1440	0.0913	0.1188	0.0969	0.0773	0.0995	-1.0000	0.0851	0.3244	0.0904	0.1025	0.0891	0.1100	0.3244	0.0851	0.0657	-1.0000	0.0851	0.0871	0.1100	0.0739	0.1025	0.0891	0.0952	0.0739	0.1025	0.0891
Brassica napus cv Drakkar	Drakkar_C09	0.1337	0.0468	0.0961	0.0404	0.0993	0.0433	0.0783	-1.0000	0.0793	-1.0000	0.0803	0.0553	0.0849	0.0793	-1.0000	0.0847	0.0783	-1.0000	0.0512	0.0849	0.0470	0.0803	0.0530	0.1112	0.0470	0.0803	0.0553	0.0851
Brassica napus cv Drakkar	Drakkar_A09	0.1392	0.0555	0.1001	-1.0000	0.1039	0.0894	0.0878	0.0404	0.0857	0.0403	0.0907	0.0362	0.0899	0.0857	0.0404	0.1001	0.0878	0.0404	-1.0000	0.0899	0.0511	0.0907	0.0346	0.1186	0.0511	0.0907	0.0362	0.0969	0.0404
Brassica napus cv Drakkar	Drakkar_A03	0.1360	0.1125	0.0931	0.0945	0.0280	0.0936	0.0708	0.0884	0.1709	0.0910	0.1070	0.0895	0.3211	0.1709	0.0884	0.0256	0.0708	0.0884	0.0855	0.3211	0.0754	0.1070	0.0895	0.0706	0.0754	0.1070	0.0895	0.0948	0.0884	0.0945
Nei M, Gojobori T. Simple methods for estimating the numbers of synonymous and nonsynonymous nucleotide substitutions. Mol Biol Evol. 1986 Sep;3(5):418-26. doi: 10.1093/oxfordjournals.molbev.a040410. PMID: 3444411.
Yang Z. PAML 4: Phylogenetic Analysis by Maximum Likelihood. Mol Biol Evolution 2007 Sept; 24 (8): 1586–1591. https://doi.org/10.1093/molbev/msm088
