# Supplementary material for: Why old duplicated genes are not thrown away in (paleo)polyploids? Example from the petC gene in Brassica napus
Source: Springer Nature journal article supplement (doi:10.1007/s11103-023-01387-9), 2023-11-01
Supplement: MOESM5 [file 11103_2023_1387_MOESM5_ESM.xlsx]

## Sheet: TableS3
Why old duplicated genes are not thrown away in (paleo)polyploids? Example from the petC gene in Brassica napus Plant Molecular Biology Maud Facon1, Gwenaëlle Deniot1, Maryse Lodé-Taburel1, Heloïse Archambeau1, Emilie Montes1, Younès Dellero1, Loeiz Maillet1, Anne-Marie Chèvre1, Mathieu Rousseau-Gueutin1* 1IGEPP, INRAE, Institut Agro, Université de Rennes, 35650 Le Rheu, France Mathieu Rousseau-G…
Table S3. Transcription levels of the four petC gene copies. These values in RPKM (reads per kilobase of transcript per million reads mapped) were obtained using three RNA-Seq libraries from B. napus cv Darmor leaves.
	Darmor_v5_3	Darmor_v5_4	Darmor_v5_5	Average
A03p30490.1_BnaDAR	160.447	130.739	182.142	157.776
A09p02620.1_BnaDAR	280.512	225.083	318.129	274.575
C03p36910.1_BnaDAR	556.584	465.537	628.781	550.301
C09p02650.1_BnaDAR	281.39	226.439	317.178	275.002
The RNA-Seq data used for this analysis were obtained from Chalhoub et al. (2014)
Chalhoub, B., Denoeud, F., Liu, S., Parkin, I. A. P., Tang, H., et al. (2014) Early allopolyploid evolution in the post-neolithic Brassica napus oilseed genome. Science. 345, 950-953.
