# Supplementary material for: Why old duplicated genes are not thrown away in (paleo)polyploids? Example from the petC gene in Brassica napus
Source: Springer Nature journal article supplement (doi:10.1007/s11103-023-01387-9), 2023-11-01
Supplement: MOESM6 [file 11103_2023_1387_MOESM6_ESM.pdf]

**Why old duplicated genes are not thrown away in (paleo)polyploids? Example from the *petC* gene in *Brassica napus***

*Plant Molecular Biology*

Maud Facon<sup>1</sup>, Gwenaëlle Deniot<sup>1</sup>, Maryse Lode-Taburel<sup>1</sup>, Heloïse Archambeau<sup>1</sup>, Emilie Montes<sup>1</sup>, Younes Dellero<sup>1</sup>, Loeiz Maillet<sup>1</sup>, Anne-Marie Chèvre<sup>1</sup>, Mathieu Rousseau-Gueutin<sup>1\*</sup>

<sup>1</sup>IGEPP, INRAE, Institut Agro, Université de Rennes, 35650 Le Rheu, France

Mathieu Rousseau-Gueutin : mathieu.rousseau-gueutin@inrae.fr

**Table S4.** Sequences of the four *petC* gene copies in *B. napus* cv. Drakkar

>B-napus-cv-Drakkar *petC* A03 copy

ATGACTTCATCAATGGCGTCTCCTCCCTTCTCCTGCTACTCAGGTTTCACACTCGATCATTGAACA  
GTTTCATTCTTGTTTCATATGTTTCTGATCTCTACTGTGTTTTTTTTTTCTTTGGTGCAGCTTGTTCC  
AGCAGAAACGCTATGTTGGCGATGTCCTGTGATGTTTGTGAAGCCAAAGAATCATCAGATGGTG  
AGAAAGGAGAAGCTTGGTCTGAGAATTGCTTGTCAAGCAACGAGTATACCAGCAGACAATGTTCC  
AGATATGGAGAAGAGGAAGCTTTTGAATCTTCTTGTGCGGGGCTCTTCTCTCCCTACTGGCTTC  
ATGCTTGTCCCTTACGCTACCTTCTTTGCCCTCCTGGGTCAGTTTCCCTTTAATCCCTCTATGTCAC  
GATTTGTGATTGTTTTAGGAATAAGGTTATTTTGAATTTAATAAGAAATTTTACAAAATAAAATAAA  
ATGTAAACTAATTTTTTTTTAATAGCAATTTGAGGCCTATATAGAGTTTCTTGTAATCCAATTTTAT  
TGGTTTCAAATCTCTACATTTGTTTTGAAAATGCAGATCCGGAGGTGGAGGTGGTGGTACACCAG  
CCAAGGATGCACTTGGAAACGATGTAGTTGCAGCAGAATGGCTTAAGACTCATGGTCCCGGTGATC  
GAACCTTGACCCAAGGATTAAGGTAATATATTCCATTAGTATTGTAAAAGGGTCTTGCATCTC  
AATGGTATGGATTTTTATGTTGTTAATAGGGAGATCCAACCTACCTAGTTGTGGAAAACGACAAAA  
CTCTAGCTACCTACGGTATAAATGCAGTTTGCCTCATCTTGGATGTGTTGTGCCATGGAACAAAG  
CTGAGAACAAGTTCCTATGCCCTTGCCATGGTTCCCAATACAACGCCCAAGGCAGAGTCGTTAGAG  
GTCCAGCACCATTTGTAAGTCAAATACATTATAGCAAAAAGACTTAGCGTATCTCTCATGTAAATAT  
TCTAAAACAAAACCTTAATTTGATGGAACAGTCGCTTGCTTGGCTCACGCGGATATTGATGACAGT  
GGAAAGGTTCTATTTGTTCCATGGGTTGAAACTGATTTTCAGGACTGGTGATGCCCCATGGTGGTCTT  
AA

- Exon 1
- Exon 2
- Exon 3
- Exon 4
- Exon 5

Guide 320: CCAAGGATGCACTTGGAAACGAT

Guide 502: ATCTTGGATGTGTTGTGCCATGG

>B-napus-cv-Drakkar *petC* A09 copy

ATGGCGTCTCTCCATTTCCCCTGCTACTCAGGTTTAACTCTCTCCATCATTTTAATCAAAAAGTCT  
CTTTCTTGTTTCATGGGTCTTGTTTATTCTTGAACCTTTGTTGTGCTGTGTCAGCTTGTTCCGAGCAG  
AAGTGCTACTATGTTGGCGATGATGTCGCGTGGGATGTTTGTGAAGCCAGCGAGGACGAGTCACCA  
GATGGTGAGGAAGGAGAAGATTGGTCTGAGAATCGCTTGTGAGGCGACGAGTATACCAGCAGACA  
ATGTTCCAGACATGGAGAAGAGGAAGCTTTTGAATCTTCTTGTGCGGAGCTCTTCTCTCCCTAC  
TGGCTTCATGCTTGTGCTTACGCTACCTTCTTGTCTCCTCCTGGGTCAGTTTCCCTTTAATCTCAT  
GGCTCTTGCCTTCTTCTTTTTGTTTGGAGCATTGATTATTGCATTAGGAAGTAATCTTGAGACTCTTGT  
TGTTATAAAAAGCCTTAAGAGTTGTGTCCTGTTTCAGTCTAATATGAAATTATGAATAATGTAAGAT  
GGTTTCTTGGTGTATTTTGTGATGACAATGCACTTCATAAAGTTTATTACCTCTTTGTATTGAGTTT  
TGCTTGAGAGTGAAGTTTTTCAATTTGCTCTATGTGTTTTAGCTTGTGGTTCTGTTTCACTCCAATGTG  
TAGTTAGAATAAATTTCAAGGAATTGTTGCGCGGTGGCTAGGCGCTTATAGAGGATAAATGTTT  
AGACGGGTGTCTAAACCAGTTTTTATTAACATGATTTTCCGAAAAATTGATTTGAAAAAATTGTTTT  
GAGATCAATGAACTTCATACAAAGTTTCTTTTAATTCATTGTTCTTGGTTTCATTAATAACGTTTC  
TTTGA AAAATGCAGATCAGGGGGTGGAGGTGGTGGTACTCCAGCCAAGGATGCACTTGGAAACGA  
TGTCAATTGCCGCAGAATGGCTTAAGACTCATGGTGTGCTGGTGTGATCGAACCTTGACCAAGGATTGAA  
GGTAGATGAAGAAGTTATTATCCCTTGA AACATTACTTTAAGAYCTCAATGATGTTTATTTTTAAT  
GTTATTAGGGAGATCCAACCTACCTAGTTGTGGAGAACGACAAGACACTAGCGACATACGGTATA

AACGCAGTGTGCACTCATCTTGGATGTGTTGTGCCATGGAACAAAGCTGAGAACAAGTTCCTATGT  
CCTTGCCATGGATCCCAGTACAATGCTCAAGGCAGAGTCGTTAGAGGTCCAGCTCCATTG GTAAGT  
CAAATACATTAGTCTTTCTCTAATCTCTAGGTAATTTTCTATGCTAAACTTTATTTTCATGAAAC  
ACAGTCGCTTGCCTTGGCTCATGCGGATATTGATGATGGTGAAAGGTTGTGTTTGTCCATGGGT  
GAAACTGACTTCAGGACTGGTGTATGCCCTTGGTGGTCTTAA

- Exon 1
- Exon 2
- Exon 3
- Exon 4
- Exon 5

Guide 320: CCAAGGATGCACTTGGAAACGAT

Guide 502: ATCTTGGATGTGTTGTGCCATGG

>B-napus-cv-Drakkar *petC* C03 copy

ATGACTTCATCAAAGGCATCCTCCTCCCTTTCTCCTGCTACTCAG GTTCACACTCGATCATTGAACA  
GTTTCATTCTTGTTTCATATGTTTCTGATCTCTACTTTTTTTTTTTTATTTGGTGCAGCTTGGTTCGAGTA  
GAAACTCTATGTTGGCGATGTCTCGTGTGATGTTTGTGAAGCCAACGAATCATCAGATGGTGAGAA  
AGGAGAAGATTGGTCTGAGAATTGCTTGTCAAGCGACGAGTATACCAGCAGACAATGTTCCAGAT  
ATGGAGAAGAGGAAGCTTTTGAATCTTCTTCTTGTGCGGAGCTCTTTCTCTTCTACTGGCTTCATGC  
TTGTCCCTTACGCTACCTTCTTTGCTCCTCCTGG GTCCGTCTCCTTTTAAATCCCTCTATGTCACGATTT  
GTGATTGTTTTTAGGAATAAGGTTATTTTGAATTTAATAAGAAATTTTACAAAATAAAAATAAAATGT  
AGAATTGAATTTTTTTTTTTAGCAATTTGGGGCCTATATAGAGTTTCTTGAATCCAATTTTATTGGT  
TTCAATCTCTACATTTTTTTTTTTGAAAATGCAGATCCGGAGGTGGAGGTGGTGGTACTCCAGCCAAG  
GATGCACTTGGAAACGATGTCGTTGCAGCAGAATGGCTTAAGACTCATGGTCCCAGGTGATCGAACC  
CTGACCAAGGATTAAGGTAAAATATTCCATTAGTACTGTAAAAAGGTTCTTGCATCTCAATGGT  
GTGGAACCTTATGTTGTTAATAGGGAGATCCAACCTTACCTAGTTGTGGAGAACGACAAAACCTCTAG  
CGACCTACGGTATAAACGCAGTGTGCACTCATCTTGGATGTGTTGTGCCATGGAACAAAGCTGAGA  
ACAAGTTCCTATGCCCTTGGCATGGTTCCTAACAACGCCAAGGCAGAGTCGTTAGAGGTCCAG  
CACCATTGGTAAGTCAAATACATTATAGCAAAAAGATCTAGGGTATCTCTCATGTAATATTCTGAA  
ACAAAACCTAATTTGATGGAACAGTCGCTTGCCTTGGCTCACGCGGATATTGACGACAGTGGAAAG  
GTTCTATTTGTTCCATGGGTTGAAACTGATTCAGGACTGGTGTATGCCCATGGTGGTCTTAA

- Exon 1
- Exon 2
- Exon 3
- Exon 4
- Exon 5

Guide 320: CCAAGGATGCACTTGGAAACGAT

Guide 502: ATCTTGGATGTGTTGTGCCATGG

>B-napus-cv-Drakkar *petC* C09 copy

ATGGCGTCTCTCCCAATTTCCCCTGCTACTCAG GTTTCACACTCTCGTTCATTTTAAATCAAAAAGTCT  
CTTTCTTGTTTCATGGGTCTTGTTTATTCTTGAGTTTTGTTGTCGTGGGTGCAGCTTGGTTCGAGCAG  
AAGTGCTACTATGTTGGCGATGATGTCGCGTGGGATGTTTCGYGAAGCCAGCGAGGACGAGTCACC  
AGATGGTGAAGGAAGGAGAAGATTGGTCTGAGAATCGCTTGTGAGGCGACGAGTATTCCAGCGGAA  
AATGTTCCAGACATGGAGAAGAGGAAGCTTTTGAATCTTCTTCTTGTGCGGAGCTCTTTCTTTACCTA  
CTGGCTTTATGCTTGTGCCTTACGCTACCTTCTTTGCTCCTCCTGG GTCAGTTTCCCTTTTTAATCTC  
ATGGCTCTTGCCTTCTTCTTTTTTGTCTGAACATTGATTATTGCATTAGGAATTTATCTCGAGACTCT  
TATCGTTACAAAAGCCTTAAGAGTAGTGTCTGTTTCAGTCTAATATGAAATTATGAATAATGTTA  
GATGGTTTCTTTGGTGTACTGAGATGTTATTACAATAACAGTTCATAAATTTATTACCTCTTTGTG  
TTGAGTTTGTGTTGAGTGTGAAGTTTTTCAATTTGCTCTATATGCTTTTAGCTTGTGGTTCTATCTGACT  
TCAATGTGTAGTACTAGTTAGAATAATGTTCAAGAAATCGCTAGGCGGTGGTTACACGCTTTAT  
AGAGGATAAATGTTTAGGTGGGTGTCTAAGCCGATTTTTTAAACGTCATTTTTTGAAAAATTGATTT  
GGARAAATGTTTTGTTTTCAGATCCGATTTGCCGACTAGACCGATAAAAACCTGGTTAGAACAACCTG  
GAGACAGTTTCTTTTTATCTTACTGAGATGTTGTGAGATCAATGAGACTTCATTGAGAGTTTTTTCC  
AGTTCATTGTTCTTGGTTTCTTTAATCTCTAACGTTTCTTTGAARAAAATGCAGATCAGGAGGTGAA  
GGTGGTGGTACACCAGCCAAGGATGCACTTGGAAACGATGTAATTGCAGCGGAGTGGCTAAAGAC  
TCACGGTGTGTTGATCGAACCTTGACCAAGGATTGAAGGTAGATGAAGAAGTTATTAAGCCCTT  
GAAAATCACTTGTATCTCAATGATGTTTATTTTAAATGTTATAGGGAGATCCAACCTTACCTAGTTGT  
GGAGAACGACAAGACTAGCGACATACGGTATAAACGACAGTATGCACACACTCTGGATGTGTTG  
TGCCATGGAACAAAGCTGAGAACAAGTTCCTATGTCTTGCCTGGATGGATCCCAATACAATGCACAAG  
GCAGAGTCGTTAGAGGTCCAGCTCCATTGTAAGTCAAATACATTGGTCTTTCTCTAGTATATCT

CTGAGTAAACTGTCTATGCTAAACTTGATTTTCATGAAACACAGTCGCTTGCCTTGGCTCATGCSGA  
TATTGATGATGGTGGAAAGGTTGTGTTTGTCCATGGGTTGAAACTGACTTCAGGACTGGTGATGC  
CCCTTGGTGGTCTTAA

Exon 1

Exon 2

Exon 3

Exon 4

Exon 5

Guide 320: CCAAGGATGCACTTGGAAACGAT

Guide 502: ATCTTGGATGTGTTGTGCCATGG
