# Supplementary material for: Why old duplicated genes are not thrown away in (paleo)polyploids? Example from the petC gene in Brassica napus
Source: Springer Nature journal article supplement (doi:10.1007/s11103-023-01387-9), 2023-11-01
Supplement: MOESM7 [file 11103_2023_1387_MOESM7_ESM.xlsx]

## Sheet: Feuil1
Why old duplicated genes are not thrown away in (paleo)polyploids? Example from the petC gene in Brassica napus Plant Molecular Biology Maud Facon1, Gwenaelle Deniot1, Maryse Lode-Taburel1, Heloïse Archambeau1, Emilie Montes1, Younes Dellero1, Loeiz Maillet1, Anne-Marie Chèvre1, Mathieu Rousseau-Gueutin1* 1IGEPP, INRAE, Institut Agro, Université de Rennes, 35650 Le Rheu, France Mathieu Rousseau-G…
Table S5. List of the primer pairs used to either amplify and sequence the different B. napus cv. Drakkar petC copies (wild type or mutated)
Name	Type	Sequence (5'- 3')
A03-1F	Primer For	GCAGGATCGAACTACGGACC	whole A03 petC gene amplification (1729pb)
A03-1R	Primer Rev	TTGCTTCACTGGGCTACCTG
A03int-1F		TCGGAGCTCTTTCTCTCCCA	Internal primers for sequencing
A03int-1R		GGTGCTGGACCTCTAACGAC
A03int-2F		CCACTGTCATCAATATCCGCG
A03int-3F		GTCCCTTACGCTACCTTCTTTG
HRM-petC-A03-Gall320-R		CTCCCTATTAACAACATAAAAATCCAT	Primers used to identify potential mutations for A03 copy
HRM-petC-A03-Gall502-F		TCTTGCATCTCAATGGTATGGATT
A09-1F	Primer For	GGGCCTAACAGCTAACAAACC	whole A09 petC gene amplification (2114pb)
A09-1R	Primer Rev	ACACGCAGGATCGAACTACG
A09int-1F	Primer For	GGCTTAAGACTCACGGTGCT	Internal primers for sequencing
A09int-1R	Primer Rev	GGGCATCACCAGTCCTGAAG
A09int-2F	Primer For	GCTACCTTCTTTGCTCCTCCTG
HRM-petC-A09-Gall320-R		AGATCTTAAAGTAATGTTTCAAGGGAA	Primers used to identify potential mutations for A09 copy
HRM-petC-A09-Gall502-F		TTATTCCCTTGAAACATTACTTTAAGAT
C03-113F	Primer For	AAGTTCCATCACCAAAACCCT	whole C03 petC gene amplification (1193bp)
C03-958R	Primer Rev	GGGAAGAATTCACAGAGTAATGCC
C03int-1F	Primer For	GACTCATGGTCCCGGTGATC	Internal primers for sequencing
C03int-1R	Primer Rev	GGGCATCACCAGTCCTGAAA
HRM-petC-C03-Gall320-R		CTCCCTATTAACAACATAAAGTTCCAC	Primers used to identify potential mutations for C03 copy
HRM-petC-C03-Gall502-F		TTGCATCTCAATGGTGTGGAAC
C09-1F	Primer For	TTGGCCCGTTAAAAGCCCAT	whole C09 petC gene amplification (2056bp)
C09-1R	Primer Rev	CGGGCTTCTTGTAAAGAATGTACA
C09int-1F	Primer For	GCTTGTGCCTTACGCTACCT	Internal primers for sequencing
C09int-1R	Primer Rev	GGACCTCTAACGACTCTGCC
C09int-2F	Primer For	CCAAGGAGTGAAGGTAGATGAAG
C09int-3F	Primer For	GGCTTTATGCTTGTGCCTTACG
C09int-5R	Primer Rev	GTGCTGGTGATCGAACCTTGACC
C09int-6R	Primer Rev	CAGTAACACCAAAGAAACCATC
HRM-petC-C09-Gall320-R		GATCAAGTGATTTTTCAAGGGCT	Primers used to identify potential mutations for C09 copy
HRM-petC-C09-Gall502-F		TAAGCCCTTGAAAAATCACTTGA
