# Supplementary material for: Why old duplicated genes are not thrown away in (paleo)polyploids? Example from the petC gene in Brassica napus
Source: Springer Nature journal article supplement (doi:10.1007/s11103-023-01387-9), 2023-11-01
Supplement: MOESM8 [file 11103_2023_1387_MOESM8_ESM.pdf]

**Why old duplicated genes are not thrown away in (paleo)polyploids? Example from the *petC* gene in *Brassica napus***

*Plant Molecular Biology*

Maud Facon<sup>1</sup>, Gwenaëlle Deniot<sup>1</sup>, Maryse Lode-Taburel<sup>1</sup>, Heloïse Archambeau<sup>1</sup>, Emilie Montes<sup>1</sup>, Younes Delloero<sup>1</sup>, Loeiz Maillet<sup>1</sup>, Anne-Marie Chèvre<sup>1</sup>, Mathieu Rousseau-Gueutin<sup>1\*</sup>

<sup>1</sup>IGEPP, INRAE, Institut Agro, Université de Rennes, 35650 Le Rheu, France

Mathieu Rousseau-Gueutin : [mathieu.rousseau-gueutin@inrae.fr](mailto:mathieu.rousseau-gueutin@inrae.fr)

**Table S6.** Synthesized fragment that was inserted in the pDONR207. This fragment contained attB1 sequence, the first guide driven by the BnU3 promoter and followed by a scaffold, the second guide driven by a BnU6 promoter followed by a scaffold and an attB2 region.

```
GGGGACAAGTTTGTACAAAAAAGCAGGCTTCGAGCTCGAATTCACAAATCTTTCACCTTTTA  
TTAATTTGAAAATCCTTGTTGTGTTTTGTTTTGTTCTCATGCTTCAACTCTGTTACTATACTTTTGCTA  
AACCACATGATTTTACAAAATTTGTTAATTAATTAGGACTATCTTGTGTAACCTTTGAGTTTTGACA  
CATATAGATAGGCGTTAAATACCTAAATACCTAAATGGGCCTTCACCCATCTATGGTCTTACAAAA  
GTATTGTTTTGATCTGGATTAGCATCCACATCGCTGCATTGGCGAAGAACTCGTAGTATATGTT  
AGGCTGAACGAGCGATGATGGTCATCGTTCCAAGTGCATCCTGTTTTAGAGCTAGAAAATAGCAAG  
TTAAAATAAGGCTAGTCCGTTATCAACTTGAAAAAGTGGCACCGAGTCGGTGCTTTTTTTGAGCTG  
AGATCTACATATACATTAGACATCAATACATAATAACCGCAGCAATGCTCTGGCTTCAGCTCATGT  
GACTACTAGTTTCAGATTCTAGTATTTGAAATTGAGCGTTCTATACAGCATAAAAATCTACTTGGACA  
AGGTGGTAAGAGAATATGGAAGATAACGTTAATGGGCTTAGTACAATTAATAGAAAGAGATGCCT  
TATGATAAATAGGCCCATTTAAGCTTTTAAAGACGTTAGTTAACAACCTTGAAAGTCCCAATCGCT  
CAGGTGAAGAGAAGTAGCTGAGTTTATATAGCTATGGAGTCACGAGAGTGATTGATCTTGGATGTG  
TTGTGCCAGTTTTAGAGCTAGAAATAGCAAGTTAAAATAAGGCTAGTCCGTTATCAACTTGAAAAA  
GTGGCACCGAGTCGGTGCTTTTTTTGAGCTCGTCGACCCAGCTTCTTGTACAAAGTGGTCCCC
```

attB1  
BnU3 promoter  
gRNA-320  
scaffold  
BnU6 promoter  
gRNA-502  
attB2
