# Supplementary material for: Why old duplicated genes are not thrown away in (paleo)polyploids? Example from the petC gene in Brassica napus
Source: Springer Nature journal article supplement (doi:10.1007/s11103-023-01387-9), 2023-11-01
Supplement: MOESM9 [file 11103_2023_1387_MOESM9_ESM.xlsx]

## Sheet: Feuil1
Why old duplicated genes are not thrown away in (paleo)polyploids? Example from the petC gene in Brassica napus Plant Molecular Biology Maud Facon1, Gwenaelle Deniot1, Maryse Lode-Taburel1, Heloïse Archambeau1, Emilie Montes1, Younes Dellero1, Loeiz Maillet1, Anne-Marie Chèvre1, Mathieu Rousseau-Gueutin1* 1IGEPP, INRAE, Institut Agro, Université de Rennes, 35650 Le Rheu, France Mathieu Rousseau-G…
Table S7. Mutations identified in each T0 transformed plant and number of T1 progenies (including Cas9 free) sown to fix the mutation
T0 plant name	Number of mutated alleles identified per T0	Nb. T1 seeds	Number of T1 CA9 free	Nb. plants with white leaves
1.2	2 mutated alleles : 1 on A03 and 1 on C03	140	0	0
1.3	6 mutated alleles: 2 on A03, 2 on C03, one on A09 and one on C09	154	1	25 (including plant 28h)
16.1	2 mutated alleles on A09	107	2	0
16.2	2 mutated alleles : 1 on A03 and 1 on C03	92	2 (including plant 16h)	0
16.3	3 mutated alleles : 1 on A03, 1 on A09, and 1 on C09	264	5 (inc. plants 37d and 42a)	0
It is important to note that for all the plants (28h,16h, 37d and 42a) that we investigated more finely phenotypically, we validated by Sanger sequencing that each copy was homozygous (either wild type or mutant)
